# Supplementary material for: Predictive Nomogram for the Prediction of Recurrence of Cutaneous Squamous Cell Cancer
Source: Research Square preprint supplement (doi:10.21203/rs.3.rs-1619187/v1), 2022-05-10
Supplement: Supplementary file 1 [file 94e781e0c2aa90c25faf1afe.docx]

TABLE 1 and 2

TABLE 1 | The demographic and clinical features of cSCC patients with and without recurrence.


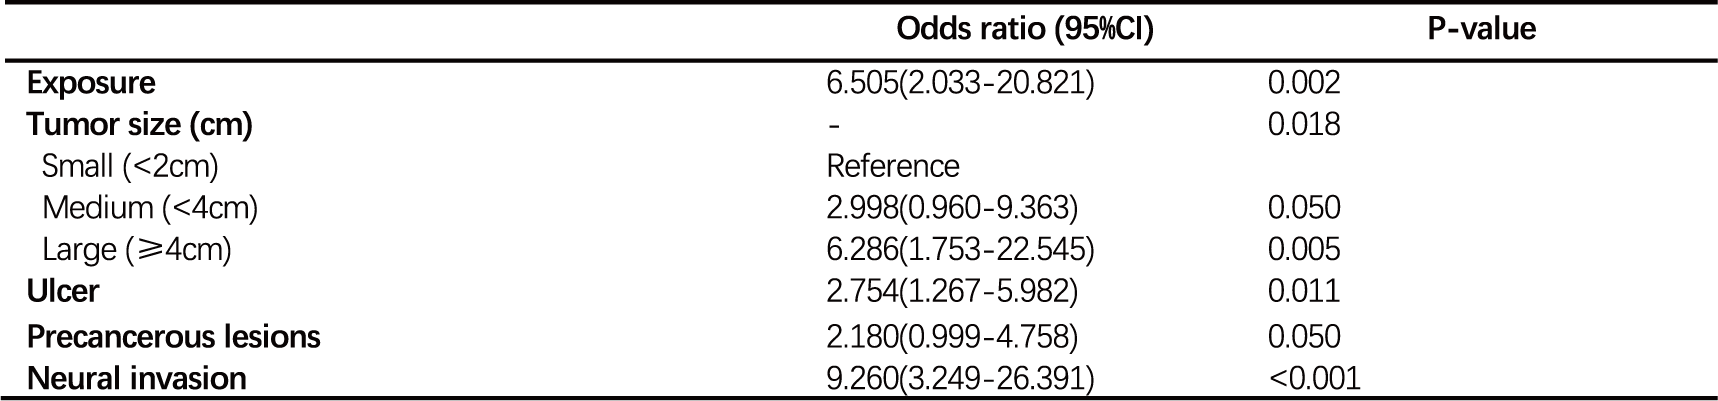


TABLE 2 | The multivariate logistic regression analysis of recurrence of cSCC.
